# Supplementary material
Source: HighWire-hosted journal article supplement (https://bibliotheek.ehb.be/content/29/12/1019)

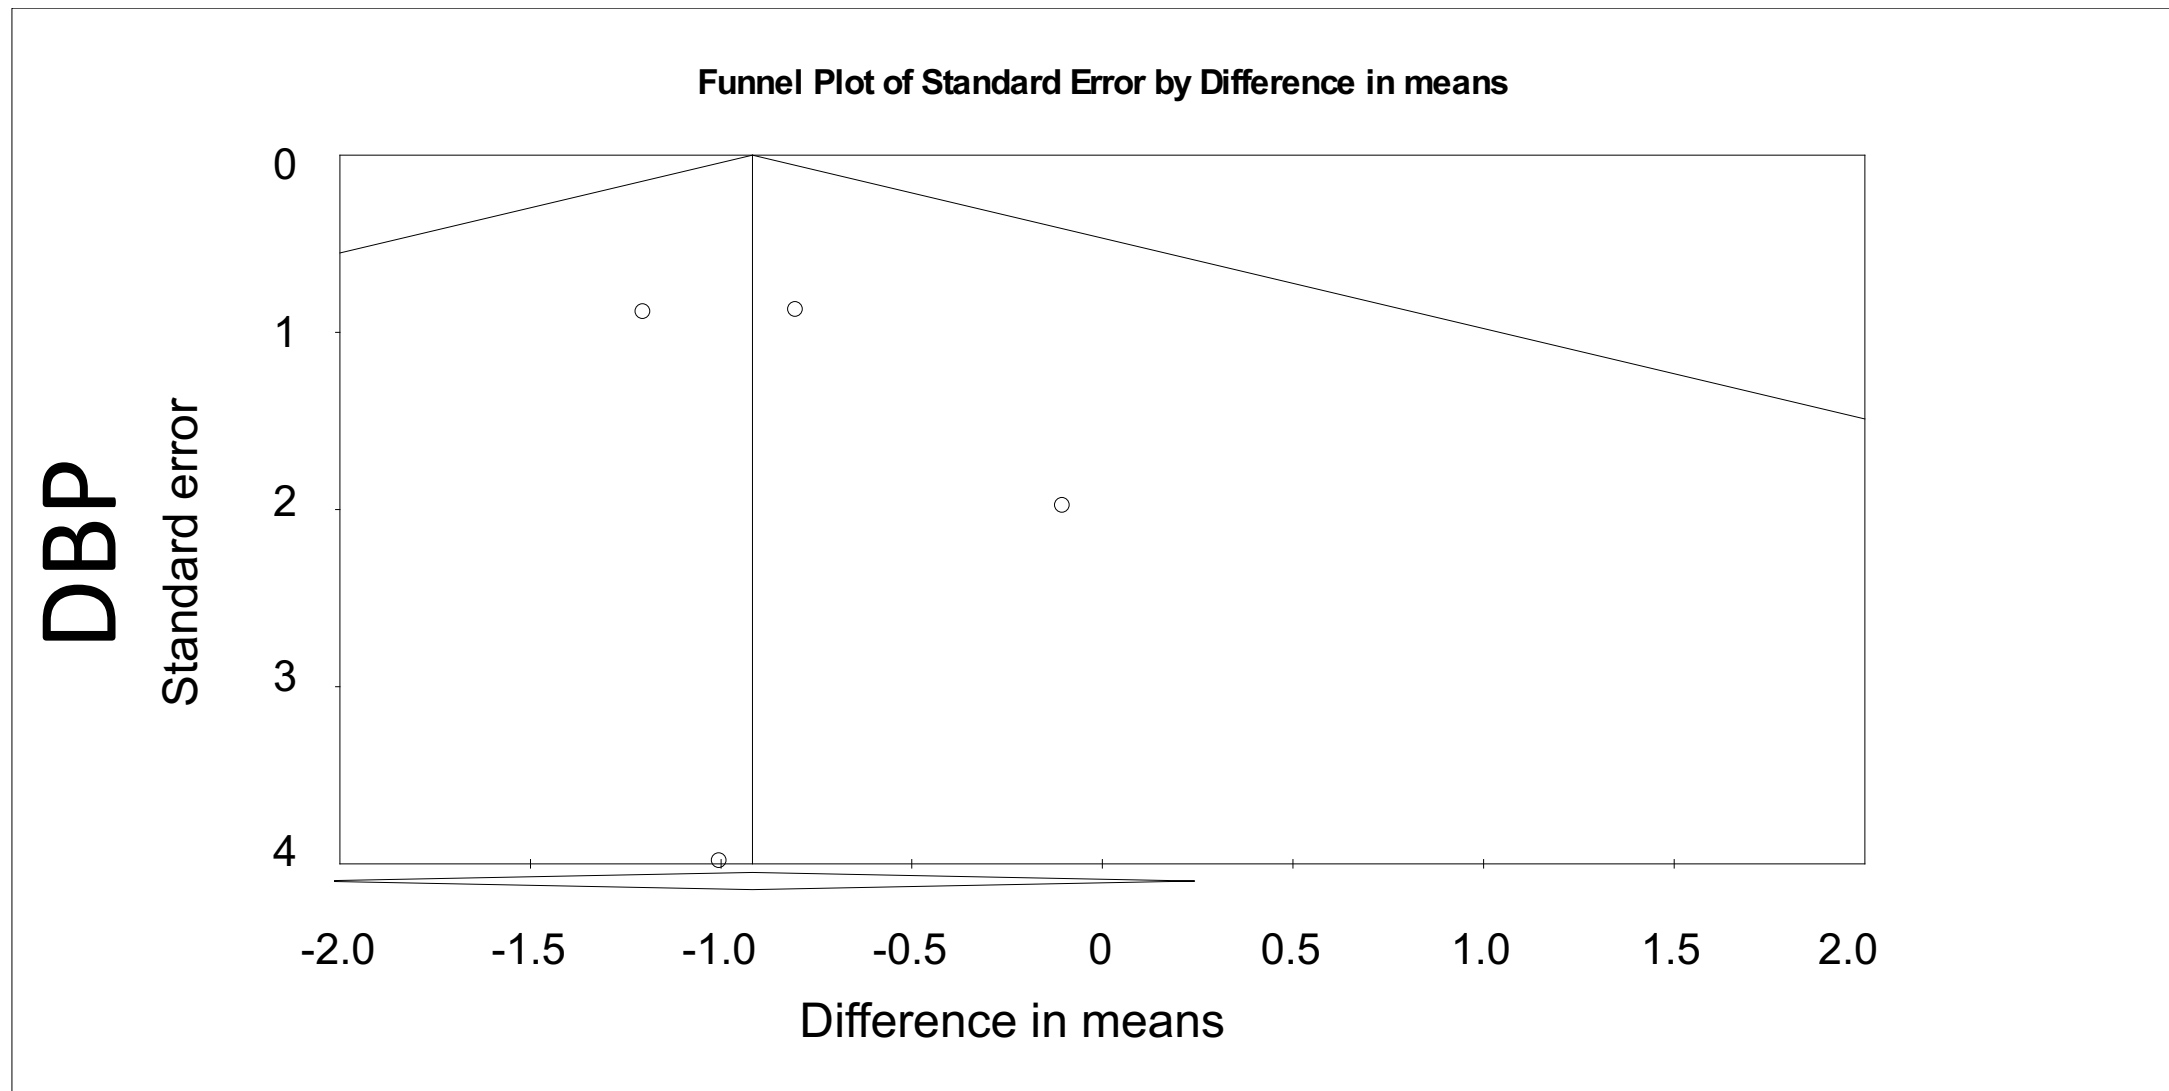

Supplement: inline-supplementary-material-8 [file inline-supplementary-material-8.pdf]
